# Supplementary material for: The preparation of novel triphenylamine-based AIE-effect fluorescent probe for selectively detecting mercury(ii) ion in aqueous solution
Source: Royal Society of Chemistry journal article supplement (doi:10.1039/d1nj00270h), 2021-01-01
Supplement: d1nj00270h1.pdf [file d1nj00270h1.pdf]

## Supporting information

### Preparation novel triphenylamine-based fluorescent probe with AIE active for high selectively detecting mercury (II) ion

| <b>TABLE OF CONTENTS</b>                                                                                    | <b>PAGE</b> |
|-------------------------------------------------------------------------------------------------------------|-------------|
| <b>S1. <sup>1</sup>H NMR spectra of TPA-CHO</b>                                                             | <b>1</b>    |
| <b>S2. <sup>13</sup>C NMR spectra of TPA-CHO</b>                                                            | <b>1</b>    |
| <b>S3. LC-MS spectra of TPA-CHO</b>                                                                         | <b>2</b>    |
| <b>S4. <sup>1</sup>H NMR spectra of TPA-ME</b>                                                              | <b>2</b>    |
| <b>S5. <sup>13</sup>C NMR spectra of TPA-ME</b>                                                             | <b>3</b>    |
| <b>S6. LC-MS spectra of TPA-ME</b>                                                                          | <b>3</b>    |
| <b>S7. Fluorescence intensity of TPA-CHO and TPA-ME</b>                                                     | <b>4</b>    |
| <b>S8. UV-vis absorption spectroscopies of two fluorophores in different solvents with various polarity</b> | <b>4</b>    |
| <b>S9 LC-MS spectra of TPA-ME and Hg<sup>2+</sup></b>                                                       | <b>5</b>    |

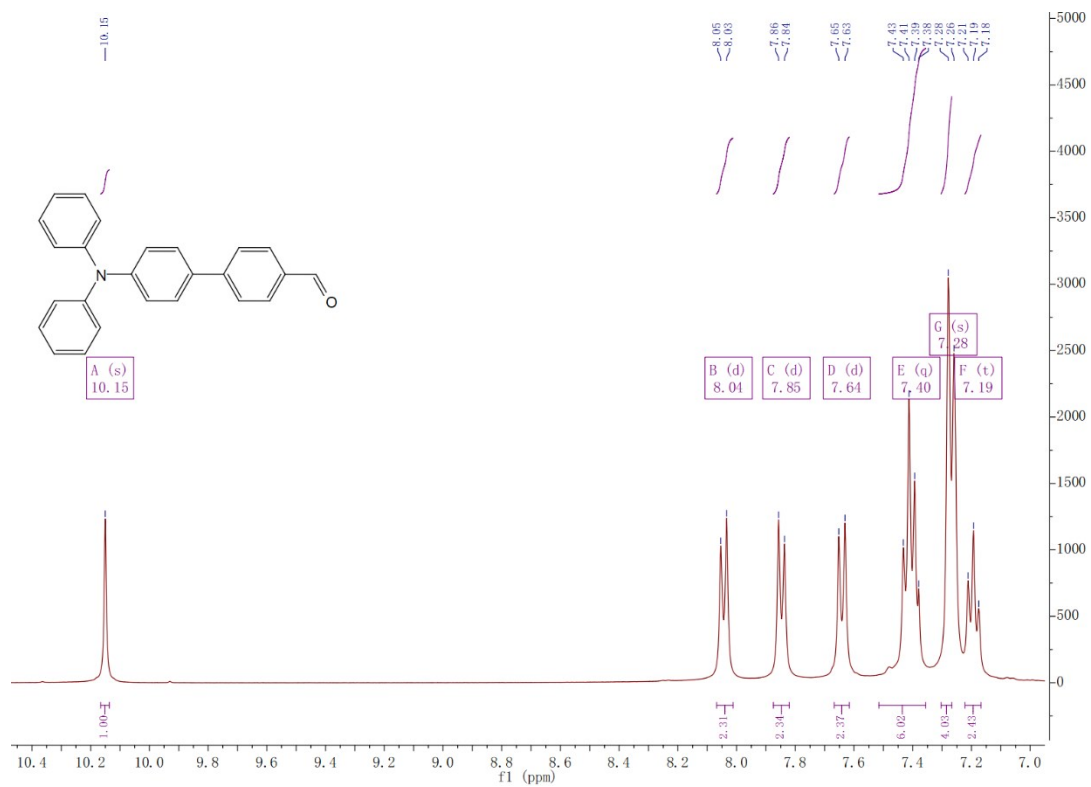

**Figure S1. <sup>1</sup>H NMR spectra of TPA-CHO**

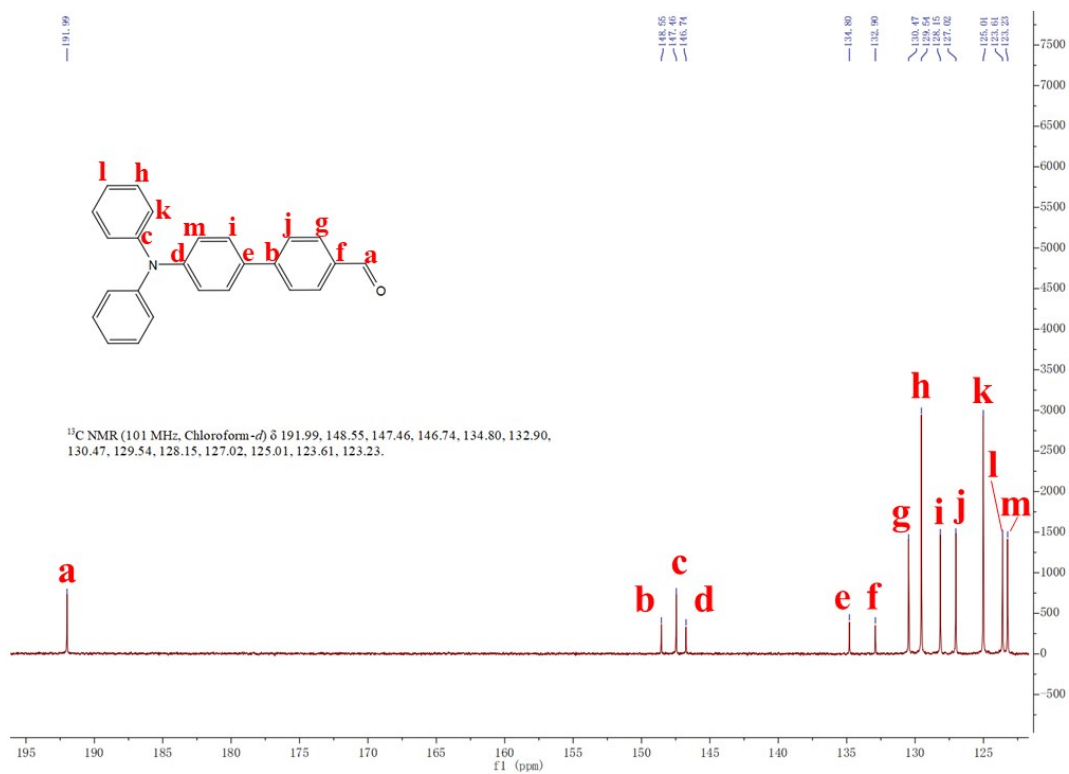

**Figure S2. <sup>13</sup>C NMR spectra of TPA-CHO**

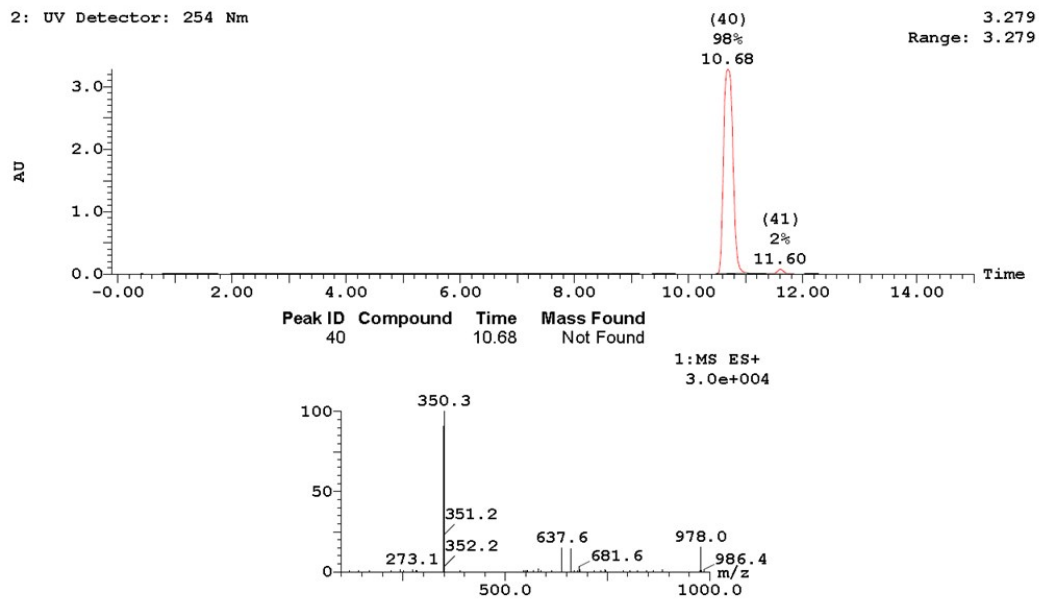

Figure S3. LC-MS spectra of TPA-CHO

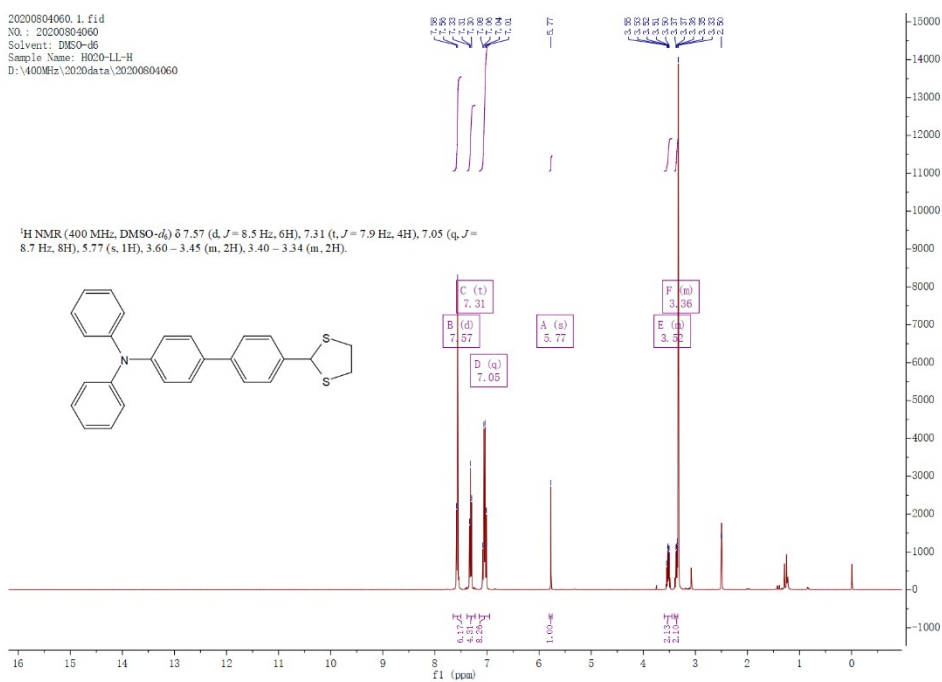

Figure S4. <sup>1</sup>H NMR spectra of TPA-ME

20200804061.1.Fid  
 NO.: 20200804061  
 Solvent: DMSO-d6  
 Sample Name: H020-LL-C  
 D:\400MHz\2020data\20200804061

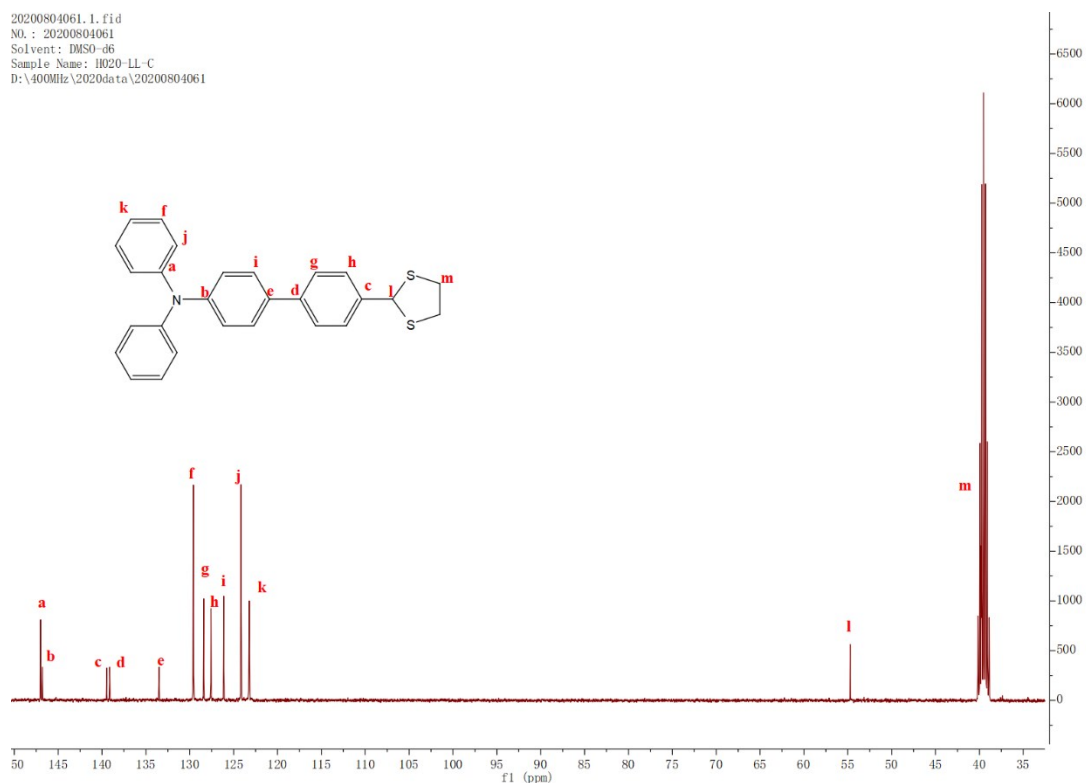

Figure S5. <sup>13</sup>C NMR spectra of TPA-ME

Sample 1 Vial 5,1:93 ID H020-LL-01 File H020-LL-01 Date 29-Sep-2020 Time 18:18:32 Description

2: UV Detector: 254 Nm

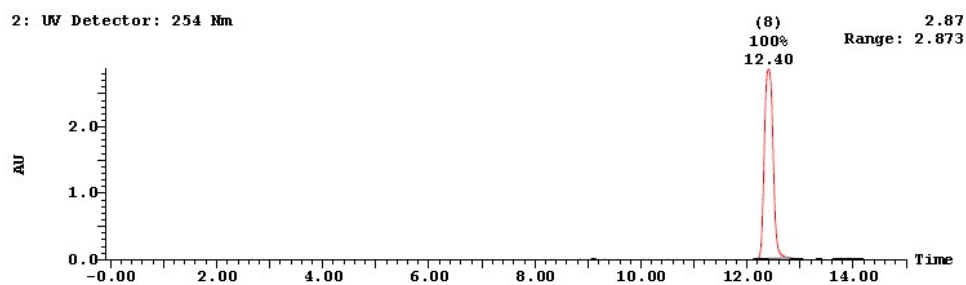

| Peak ID | Compound | Time  | Mass Found |
|---------|----------|-------|------------|
| 8       |          | 12.40 | Not Found  |

1:MS ES+  
1.5e+004

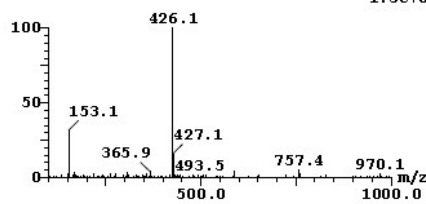

**Figure S6.** LC-MS spectra of TPA-ME

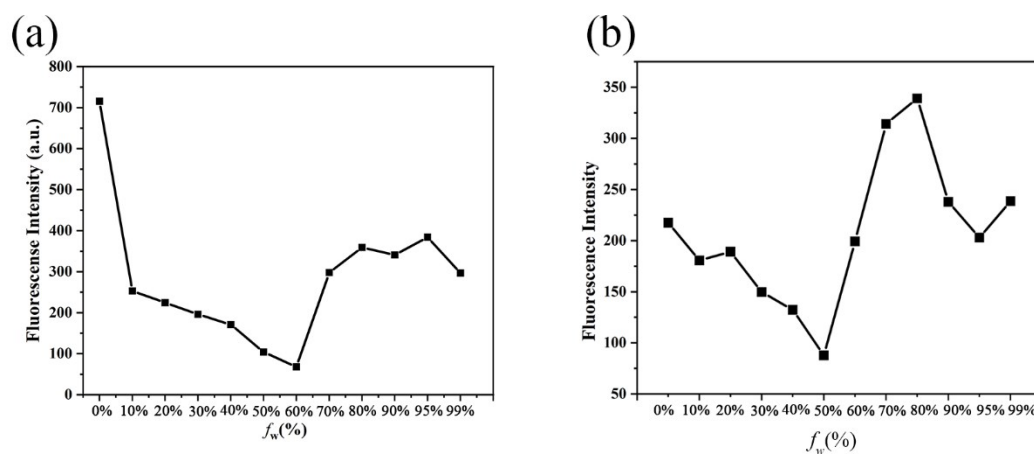

**Figure S7.** Fluorescence intensity of TPA-CHO and TPA-ME in DMF/H<sub>2</sub>O ( $f_w$  0 – 99%) medium

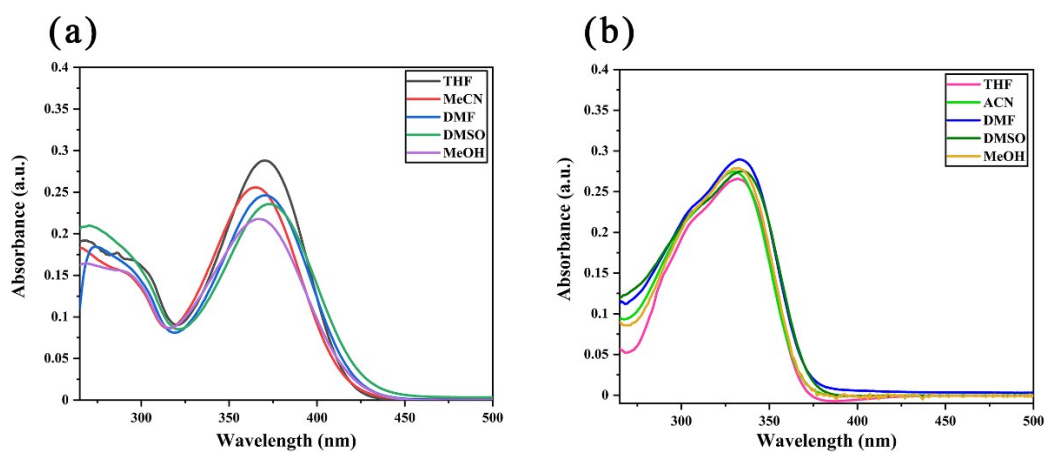

**Figure S8.** UV-vis absorption spectroscopies of two fluorophores in different solvents with various polarity ( $1 \times 10^{-5} \text{ mol} \cdot \text{L}^{-1}$ ). (a) TPA-CHO, (b) TPA-ME.

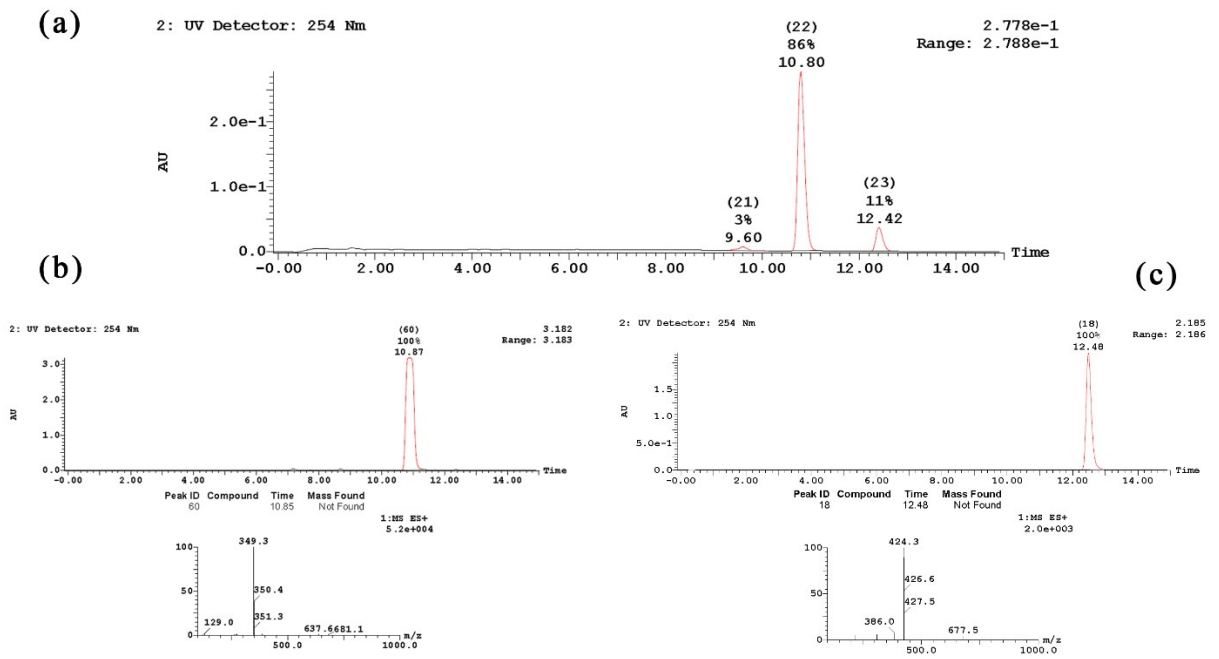

**Figure.S9** (a) LC-MS spectra of reaction mixture TPA-ME and Hg<sup>2+</sup>. (b) LC-MS spectra of pure TPA-CHO. (c) LC-MS spectra of pure TPA-ME
